# Supplementary material for: Genome-Wide Analysis of Auxin Response Factors in Lettuce (Lactuca sativa L.) Reveals the Positive Roles of LsARF8a in Thermally Induced Bolting
Source: MDPI journal article supplement (doi:10.3390/ijms232113509), 2022-11-04
Supplement: s1 [file s1]

**Supplementary Table S1. Primers used in qRT-PCR experiments.**

| <b>Primers</b> |                       | <b>Sequence (5'→3')</b> |
|----------------|-----------------------|-------------------------|
| Lsa13          | CACTTCTCCCCCAACTTCAA  | LsARF6                  |
| Lsa14          | GCAGAGCGAGGGATGTTAAG  |                         |
| Lsa15          | TCCCATCATGTTTCGACTTCA | LsARF19b                |
| Lsa16          | CCAAAAAGGACGGATTTTGA  |                         |
| Lsa17          | CGATCCTCAGCTTCATCTCC  | LsARF1                  |
| Lsa18          | AGCCTCAAGCTGTTCCATGT  |                         |
| Lsa19          | AGAAGCTTGTGTGCGGAGAT  | LsARF3a                 |
| Lsa20          | TTGACCACATTCGCAAAGTC  |                         |
| Lsa21          | ATCTTGCCACCTGATGCTCT  | LsARF7b                 |
| Lsa22          | ACCCCATTCCTTAAAACACC  |                         |
| Lsa23          | GAGGAGGACAAATCGACCAA  | LsARF8a                 |
| Lsa24          | TCCCAAACATTTACCCCAAT  |                         |
| Lsa25          | ACCAAGGTTCAAATGCAAGG  | LsARF9c                 |
| Lsa26          | CACAATTTCCCATTTGGTTCC |                         |
| Lsa27          | ACTCGATTACACCGCAGACC  | LsARF16a                |
| Lsa28          | TGAGCTTCTTGTGGTTCACG  |                         |
| Lsa29          | ACTCATCAAATGCCGGAAAC  | LsARF13                 |
| Lsa30          | ACCCAAACATCCTGTCAAGC  |                         |
| Lsa31          | CGATTGCAGTGTGGATGAG   | LsARF5a                 |
| Lsa32          | GGAGTATGCCCCGAGAATCAA |                         |
| Lsa33          | TATGATTCTCCGGCCATCTC  | LsARF3b                 |
| Lsa34          | TCACCCCATTTCTTCTCCAG  |                         |
| Lsa35          | GATGATCCATGGCAGGAGTT  | LsARF9a                 |
| Lsa36          | CAGCAGCCTCCAAGCTAAAC  |                         |
| Lsa37          | TGGGAAGGTGAAAGTGGAAG  | LsARF16d                |
| Lsa38          | GATCTGCATTGCGTTCTTCA  |                         |
| Lsa39          | CTTCGAAAGCATGCAAATGA  | LsARF9b                 |
| Lsa40          | TGTTAGCAAATGCCTTCGTG  |                         |
| Lsa41          | GGTGACATGATGCTTGTGTTG | LsARF2a                 |
| Lsa42          | TGCCTTCTGCAACTGATGAC  |                         |
| Lsa43          | CAAAACGTGAAGCGAGTCAA  | LsARF16c                |
| Lsa44          | GCTCCCTGAATGCTCGTAAG  |                         |
| Lsa45          | GTTTCTGTTGGGATGCGTTT  | LsARF8b                 |
| Lsa46          | TGATTCATCCCATCCAACCT  |                         |
| Lsa47          | CCGAAACAATTTTCCGAGA   | LsARF16b                |
| Lsa48          | AATTGCTCCAACCTGTGGTC  |                         |
| Lsa49          | CCAGATGGTGGATGGAGACT  | LsARF4                  |
| Lsa50          | CCCCACTGCTCATCAACTTT  |                         |
| Lsa51          | GGTTTTATCCGCCGACAGTA  | LsARF5b                 |
| Lsa52          | GACCGACTTCCGGTATCTCA  |                         |
| Lsa53          | TGTGCAGGGTGATTGATGTT  | LsARF10                 |
| Lsa54          | TGTTGCGTTTGTGTGTCTCA  |                         |
| Lsa55          | ACATATGTCCGCCTCCATTC  | LsARF7a                 |
| Lsa56          | CAGGGAAAATGGAACTCGAA  |                         |
| Lsa57          | TGATGACATTCCGTCGTGTT  | LsARF19a                |
| Lsa58          | CACATCTGGCTTTTGCTGAA  |                         |
| Lsa59          | GCCAAGATACTTTGCCGTGT  | LsARF2b                 |

|       |                                              |          |
|-------|----------------------------------------------|----------|
| Lsa60 | CTGTGATTCTGGTGGTGGTG                         |          |
| Lsa61 | GTGAGTGAAGAAGGGCAATG                         | 18s rRNA |
| Lsa62 | CACTTTCAACCCGATTCACC                         |          |
| Lsa69 | GACAGTTTCACAAAGTCGATTAA                      | LsFT     |
| Lsa70 | TGTGAAAAGCCCGGAGG                            |          |
| Lsa71 | CTAGAGAAAGACATACCCTCCCAC                     | LsAP1    |
| Lsa72 | TCACTTGTTTCATGTGTTGAATCA                     |          |
| Lsa73 | TGCCGGAAGAGGGTGAAAA                          | LsAP3    |
| Lsa74 | TCAAGGAAGGCGATGATCATG                        |          |
| Lsa75 | TCTGTCATGCTGAACGCAGC                         | LsLFY    |
| Lsa76 | CTAAAACTGGAGATGACCACCACC                     |          |
| Lsa77 | AATCCAAACAGACCAAGGAACAG                      | LsSOC1   |
| Lsa78 | ACTTTGACCATCTTTGCTTCGTT                      |          |
| Lsa79 | agaggaggacctgcatatgATGAAGCTTTCAACATCAGGGTCTG | LsARF8a, |
| Lsa80 | cgacggatccccggaattcAAAATCAAGTGACCCGGACCCCAT  |          |
| Lsa81 | agaggaggacctgcatatgATGAAGCTTTCAACATCAGGGTCTG | LsARF8a, |
| Lsa82 | cgacggatccccggaattcTTGAAAAGATGAAGCTCCAGGGTA  |          |
| Lsa83 | agaggaggacctgcatatgGGAGACAGCAGAGATGATGCAGT   | LsARF8a, |
| Lsa84 | cgacggatccccggaattcAAAATCAAGTGACCCGGACCCCAT  |          |

---

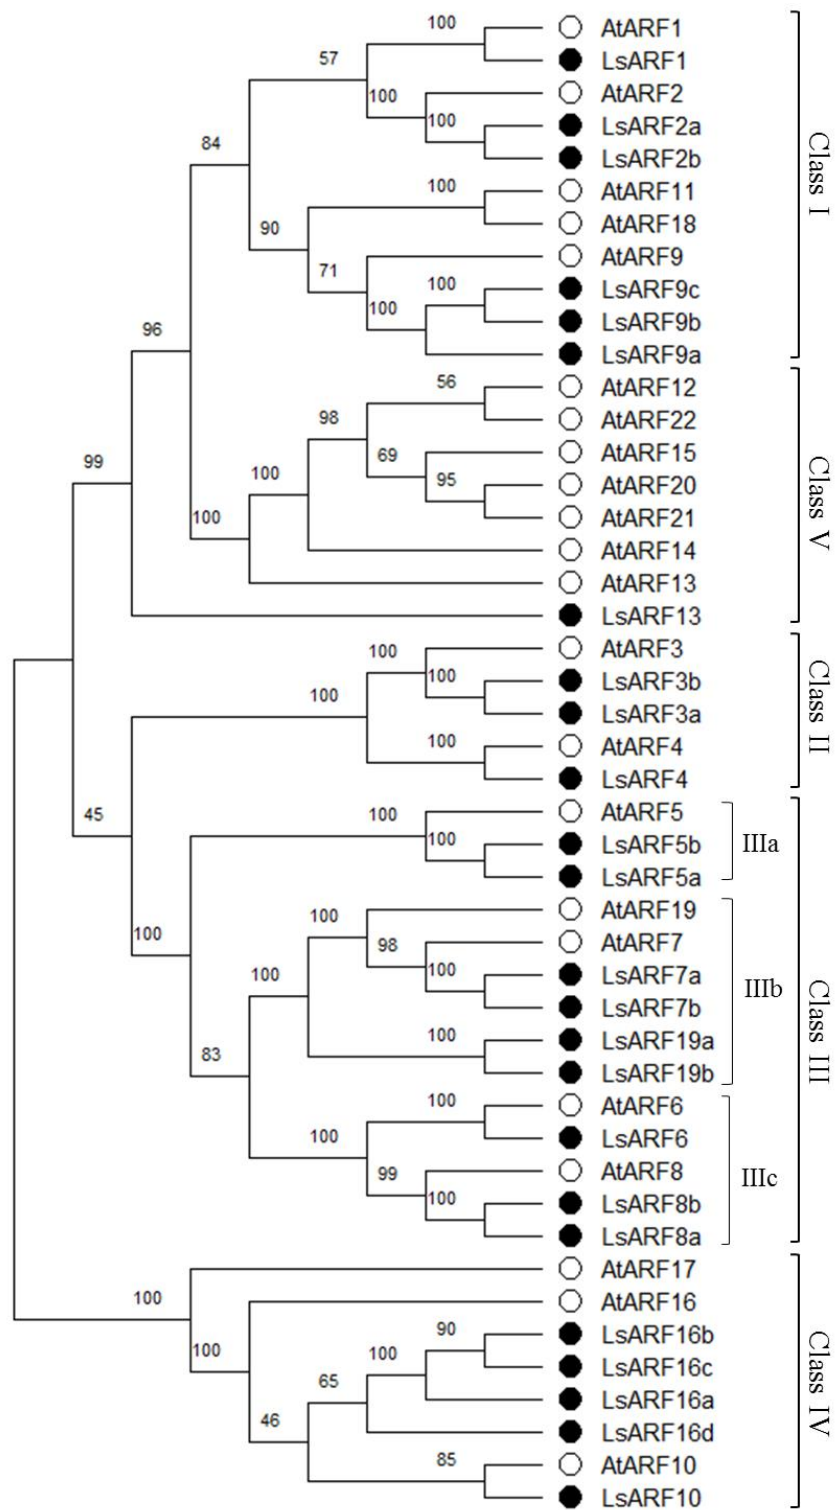

**Supplementary Figure S1. Phylogenetic relationship between Arabidopsis and lettuce ARFs.**

Based on the ARF protein sequences of Arabidopsis and lettuce, a neighbor-joining tree was generated using MEGA X with default settings.

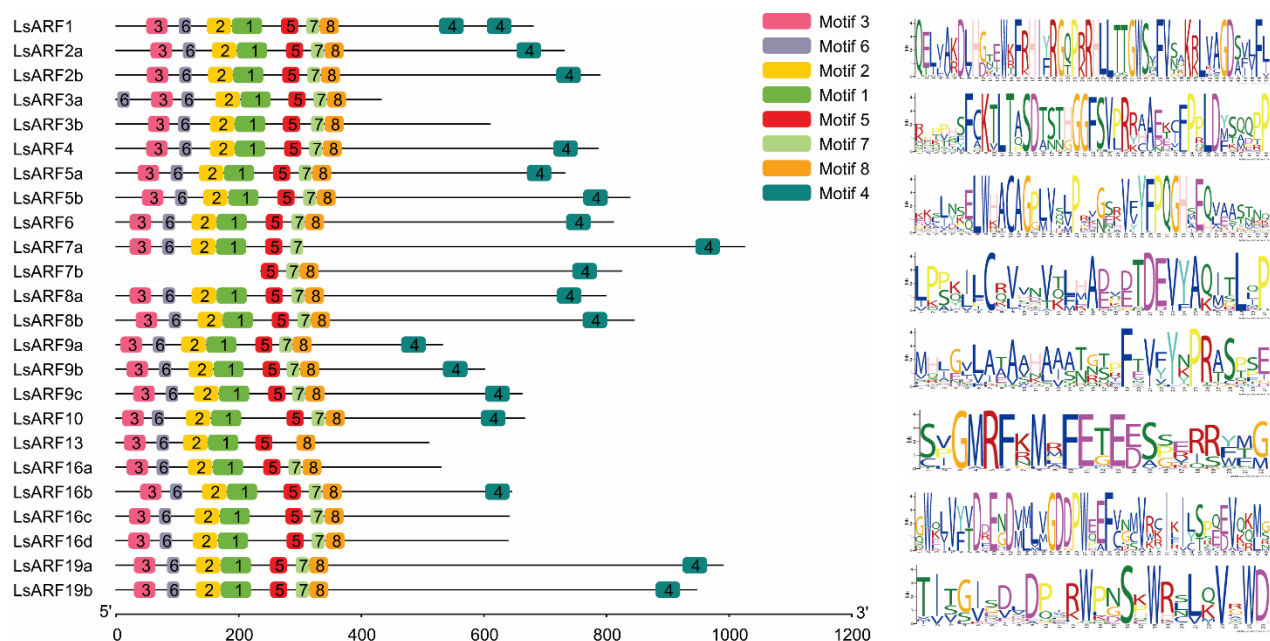

**Supplementary Figure S2. The conserved motifs of LsARFs. All motifs were identified by MEME with the complete amino acid sequences of LsARFs. The rectangles in different colors on the right represent the different motifs with the consensus sequences shown on the right alongside.**

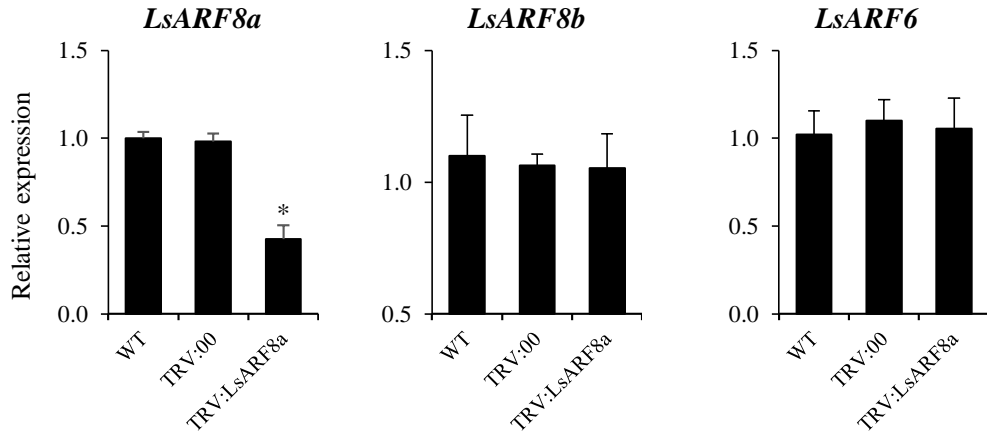

**Supplementary Figure S3. qRT-PCR analysis of *LsARF8a*, *LsARF8b*, and *LsARF6* in *LsARF8a*-silencing and control lettuce plants.** Error bars indicate SE from three biological replicates, and asterisks indicate statistically significant differences between WT and controls, as determined by the Student's *t*-test (\*,  $p < 0.05$ ).

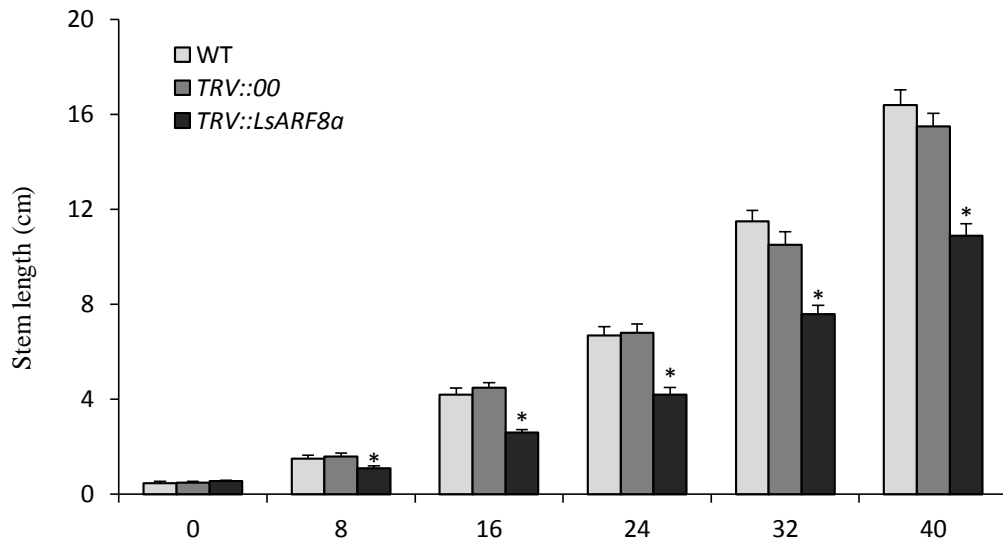

**Supplementary Figure S4. Stem length changes of *LsARF8a*-silencing and control lettuce plants under warm temperatures.** Error bars indicate SE of the mean (N=10), and asterisks indicate statistically significant differences between WT and treatments, as determined by the Student's *t*-test (\*,  $p<0.01$ ).
